# Supplementary material
Source: Research Square preprint supplement (doi:10.21203/rs.3.rs-8259665/v1)
Supplement: Supplementary file 2 [file 5ffa3bb06569d0d1bd131909.docx]

**A Study on the Impact of Neuroticism on Academic English Learning Anxiety among Medical Postgraduate Students**

**References**

[1] Abrar Ajmal & Humaira Irfan. (2020). Effects of Process-Genre Approach on Writing Anxiety among English Academic Writing Learners in Pakistan. Journal of Business and Social Review in Emerging Economies, 6(2): 741-752. <https://doi.org/10.26710/jbsee.v6i2.1215>.

[2] Ai Hua, Liu Xiaohui, Chang Fan, Shi Jiamei, Wang Xinzhu, Han Xue & Zhao Jianlei. (2025). The mediating role of learning anxiety in the relationship between personality traits and social adaptability of college students. China Medical Herald, 22(5): 97-101. <https://doi.org/10.20047/j.issn1673-7210.2025.05.19>.

[3] Aminabibi Bhatti, Habibullah Pathan & Syed Waqar Ali Shah. (2018). Exploring the Causes of Foreign Language Anxiety in an EFL Classroom: A Study of Public Sector University, Sindh Pakistan. Journal of Literature, Languages and Linguistics, 47(0), 44-51.

[4] Camelia Maria Dindelegan & Darian Faur.(2025).Psycho-metric properties and specificity to anxiety of the looming maladaptive style questionnaire (LMSQ-R): evidence from general and clinical Romanian samples. Current Psychology, (Pre-publish), 1-15. <https://doi.org/10.1007/S12144-025-08389-4>.

[5] Elisa Hernández Álvarez, Jaime Rojas Hernández, Lucas F Borkel, Domingo J Quintana Hernández, Tobías Fernández Borkel& Luis Alberto Henríquez Hernández. (2025). Preliminary Findings on Low-Dose 1cp-LSD for Canine Anxiety: Exploring the Role of Owner Neuroticism and Psychopathology. Veterinary sciences, 12(9): 872-872. <https://doi.org/10.3390/VETSCI12090872>.

[6] ElShazly Reham. (2021).Effects of artificial intelligence on English speaking anxiety and speaking performance: A case study. Expert Systems,38(3). <https://doi.org/10.1111/EXSY.12667>.

[7] Fabians, Gisela. (2023). Longitudinal associations of neuroticism with life satisfaction and social adaptation in a nationally representative adult sample. J. Pers, 91(5): 1069-1083.

[8] Fei Qin & Weibin Li. (2024). Personality traits and foreign language anxiety: The mediating role of self-efficacy. Journal of Psychology in Africa, 34(4): 360-366. <https://doi.org/10.1080/14330237.2024.2371709>.

[9] Gaot, Xiangyt, Zhangh, et al. (2020). Neuroticism and quality of life: Multiple mediating effects of smartphone addiction and depression. Psychiatry Res, 258, 457-461.

[10] Han Qiqi & Yuan Jing. (2022). A study on the effectiveness of self-evaluation of college English learners and its influencing factors—based on the Chinese English Proficiency Scale.Journal of Honghe University,20(2): 138-141. <https://doi.org/10.13963/j.cnki.hhuxb.2022.02.030>.

[11] Honggang Liu, Tong Li, Hongying Zheng, Yang Li & Jiqun Fan. (2025). Exploring the Relationship between Students’ Language Learning Curiosity and Academic Achievement: The Mediating Role of Foreign Language Anxiety. Behavioral Sciences, 15(8): 1133-1143. <https://doi.org/10.3390/BS15081133>.

[12] Jia Jing, Jing Ying, Dong Hao & Zheng Hong. (2022). Exploration of the teaching reform of English courses for postgraduate students in medical specialties. Education and Teaching Forum, (52): 54-57. <https://doi.org/CNKI:SUN:JYJU.0.2022-52-013>.

[13] Jia Wei. (2024). Anxiety in English Academic Writing of EFL Students.SHS Web of Conferences, 199. <https://doi.org/10.1051/SHSCONF/202419901001>.

[14] Lamba, A., Frank, M. J., Feldmanhall, O. (2020).Anxiety Impedes Adaptive Social Learning under Uncertainty. Psychol Sci, 31(5): 592-603.

[15] Lian Xinyue & Guo Jidong. (2020). A study on the relationship between English learning adaptability and learning anxiety among master's students. Examination and Evaluation (College English Teaching and Research Edition), (6), 93-96. <https://doi.org/10.16830/j.cnki.22-1387/g4.2020.06.018>.

[16] Li Jie & Wu Xiuling. (2025). The application effect of output-oriented theory in academic English teaching for postgraduate students in medical colleges. Journal of Gannan Medical University, 45(7): 705-709.<https://doi.org/CNKI:SUN:GNYX.0.2025-07-015>.

[17] Li Xiaomei, Xu Chang & Cao Hua.(2024). Questionnaire analysis of foreign language learning motivation and needs analysis of postgraduate students in medical colleges under the perspective of ESP - taking the course "Medical Paper English Writing" as an example. Modern English,(13): 76-79.<https://doi.org/CNKI:SUN:XDYM.0.2024-13-025>.

[18] Ma Yan & Jing Xianping.(2023). Exploration of postgraduate medical humanities English course under the background of new medicine - taking Chongqing Medical University as an example. Science Consulting,(15): 150-152.<https://doi.org/CNKI:SUN:KXZK.0.2023-15-048>.

[19] Mailing Tang.(2025).Constructing and validating the teaching strategies for alleviating Chinese EFL graduate students’ foreign language anxiety. Language Teaching Research, 29(7): 2795-2824. <https://doi.org/10.1177/13621688221115810>.

[20] Mailing Tang & Hongli Zhou.(2025).Interactions between age to start learning English, high school, and language proficiency on EFL graduate students' anxiety. Acta Psychologica, 260, 105549. <https://doi.org/10.1016/J.ACTPSY.2025.105549>.

[21] Nicole E Stumpp, Matthew W Southward, Alexandra Hines, Madeline L Kushner, Carmen Schäuffele, Martina Fruhbauerova, & Shannon Sauer Zavala. (2025). When and Under What Circumstances Does Neuroticism Change in the Unified Protocol? Psychotherapy research: journal of the Society for Psychotherapy Research, 1-12.<https://doi.org/10.1080/10503307.2025.2521779>.

[22] Ożańska Ponikwia Katarzyna, PiechurskaKuciel Ewa & Skałacka Katarzyna. (2020). Emotional intelligence as a mediator in the relationship between neuroticism and L2 achievement. Applied Linguistics Review, 14(1): 67-86. <https://doi.org/10.1515/APPLIREV-2020-0008>.

[23] Pan Hu, Kairui Li, Yu Han, Xuefeng Wang & Zheng Xiao. (2025). Anxiety and depression symptoms mediate the impact of neuroticism on insomnia in adults with epilepsy: a cross-sectional study. BMC neurology, 25(1): 312.<https://doi.org/10.1186/S12883-025-04313-2>.

[24]PiechurskaKuciel Ewa.(2021).Mediation effect of self-efficacy in the relationship between neuroticism and L2 attainment.Journal of Multilingual and Multicultural Development,42(3),262-274.<https://doi.org/10.1080/01434632.2019.1684929>.

[25] Wen Honglan & Zeng Zhihong. (2013). The role of the Big Five personality traits in predicting college students' English learning motivation and English learning performance. Academic Circles, (S1): 248-253. <https://doi.org/CNKI:SUN:SSJI.0.2013-S1-070>.

[26] Wooh, Ahnhj. (2015). Big Five Personality and Different Meanings of Happiness of Consumers. Centre of Sociological Research, NGO, 8(3): 145-154.

[27] Yu Jin, Zhang Jibo & Fan Jingyi. (2020). Analysis of the learning needs of medical postgraduates and the enlightenment of teaching reform. Education and Teaching Forum, (15): 4-10. <https://doi.org/CNKI:SUN:JYJU.0.2020-15-002>.

[28] Zhang Yunfang, Luo Shuping, Zhao Ronglan, Li Meng & Peng Xiaoxiang. (2020). A brief analysis of the problems and countermeasures of English teaching for medical postgraduates. Health Vocational Education, 38(14): 1-3. <https://doi.org/CNKI:SUN:ZDYX.0.2020-14-002>.

[29] Zhenglin Ji, Yujie Zhang, Xiaoxiao Xu, Xiaofan Yan, Bicheng Gao, Qi Sun, & Mengxue Zhao.(2025).Mindfulness and anxiety among medicine college students: a moderated mediation model of intolerance of uncertainty and neuroticism. Psychology, Health &Medicine,1-17. <https://doi.org/10.1080/13548506.2025.2539932>.

[30] Zhe Zhang & Huijun Chen. (2024). A Study on Foreign Language Learning Anxiety and Enjoyment of English Major Postgraduates. Journal of Language, Culture and Education, 1(1): 8-14. <https://doi.org/10.70267/3QPT4J23>.
