# Supplementary material
Source: Research Square preprint supplement (doi:10.21203/rs.3.rs-8259665/v1)
Supplement: Supplementary file 3 [file 69788d1385f1ce0fb2b02865.docx]

**A Study on the Impact of Neuroticism on Academic English Learning Anxiety among Medical Postgraduate Students**

**Huanan SU Fengyi MA***

Ph.D., Department of Foreign Language Education, Kunming Medical University, Kunming City, China

E-mail: [suhuanan943397038@gmail.com](mailto:suhuanan943397038@gmail.com) or [suhuanan@kmmu.edu.cn](mailto:suhuanan@kmmu.edu.cn)

ORCID: <https://orcid.org/0000-0002-8920-1743>

*Corresponding Author: Ph.D., Department of Foreign Languages, Guilin Medical University, Guilin City, China

E-mail: [1007127021@qq.com](mailto:1007127021@qq.com)

**Author Biography**

**Huanan SU** was born in 1987 and holds a PhD in English Language Studies (ELS). Since 2014, he has been serving as a Lecturer in Medical Academic English at a medical university in China. His teaching portfolio includes a range of courses such as *Medical Academic English Writing and Translation*, *Narrative Medicine: English Audio-Visual and Critical Literacy*, and *Cambridge IELTS Academic Engli*sh.

SU’s primary research areas lie within English for Academic Purposes (EAP) in medicine, focusing on its teaching, academic writing, translation, and corpus-based studies. His research trajectory has evolved towards interdisciplinary inquiry. Currently, his central research interest investigates the influence and manifestations of neuroticism in the process of learning medical academic English, particularly among medical students and postgraduate medical majors. His work aims to integrate his expertise in English language studies with the specific domain of medical education to explore the psychological and cognitive dimensions of professional language acquisition.
