# Supplementary material
Source: Research Square preprint supplement (doi:10.21203/rs.3.rs-8259665/v1)
Supplement: Supplementary file 4 [file f4cd92fe033469be15206433.docx]

**A Study on the Impact of Neuroticism on Academic English Learning Anxiety among Medical Postgraduate Students**

**Table 1 Correlation Coefficients between Total Neuroticism Score and Sub-Dimensions and AELA (N=228)**

| **Variables** | **AELA Total Score** | **Cognitive Anxiety** | **Social Anxiety** | **Behavioral Avoidance** |
| --- | --- | --- | --- | --- |
| **Neuroticism Total Score** | 0.64** | 0.58** | 0.52** | 0.47** |
| **Anxiety Tendency**  **(Sub-Dimension)** | 0.61** | 0.55** | 0.49** | 0.43** |
| **Vulnerability**  **(Sub-Dimension)** | 0.56** | 0.50** | 0.45** | 0.40** |
| **Depression Tendency**  **(Sub-Dimension)** | 0.31* | 0.28* | 0.25* | 0.22* |
| ***p<0.05，**p<0.01.** | | | | |

Table 1 shows that the total Neuroticism score is significantly positively correlated with the total AELA score and each sub-dimension (p<0.01). The "Anxiety Tendency" and "Vulnerability" sub-dimensions show the strongest correlations with the AELA (r>0.55), while the "Depression Tendency" sub-dimension has a weaker correlation (r=0.31). This suggests that individuals high in Neuroticism are more sensitive to uncertainty in academic English settings (such as difficulty understanding terminology and peer review pressure), and are more likely to exacerbate anxiety through excessive worry and mood swings. The above result correspondingly echoesCamelia Maria and Darian Faur’s (2025) research in which the impact of depression tendencies may be more pronounced on long-term learning motivation rather than immediate anxiety.

**Table 2 Differences in Anxiety Performance among Students with Different Neuroticism Levels (M ± SD)**

| **Indicators** | **High Neuroticism Group** | **Low Neuroticism Group** | **t-value** | **p-value** |
| --- | --- | --- | --- | --- |
| **AELA total score** | 82.3±9.6 | 58.7±8.2 | 18.2 | <0.001 |
| **Cognitive Anxiety** | 32.1±5.8 | 21.4±4.3 | 15.3 | <0.001 |
| **Social Anxiety** | 28.7±4.9 | 18.2±3.7 | 16.8 | <0.001 |
| **Behavioral Avoidance** | 21.5±3.6 | 12.1±2.8 | 19.7 | <0.001 |
| **HRV（ms²）** | 42.1±6.3 | 58.7±7.1 | 15.8 | <0.001 |
| **Reporting Speech Rate**  **(words/minute)** | 92±14 | 118±16 | 10.3 | <0.001 |
| **Number of Pauses**  **(times/minute)** | 4.2±1.1 | 1.8±0.7 | 18.9 | <0.001 |
| **HRV refers to heart rate variability, which reflects the regulatory capacity of the autonomic nervous system.** | | | | |

Table 2 shows that the high-neuroticism group had significantly higher scores on the AELA total score and each subscale than the low-neuroticism group (p<0.001), with the largest differences in cognitive anxiety and social anxiety (38% and 45% higher, respectively). Regarding physiological indicators, the high-neuroticism group had significantly lower HRV than the low-neuroticism group (p<0.001), indicating a weaker regulatory capacity of the autonomic nervous system. Behavioral indicators showed that the high-neuroticism group reported a slower speech rate (p<0.001) and more pauses (p<0.001), further confirming Qin and Li’s (2024) study in which the inhibitory effect of anxiety has much to do on the output of learners’ second language acquisition.

**Table 3 Results of the Path Analysis of the Effect of Neuroticism on AELA**

| **Paths** | **Standardized Path Coefficient** | **p-value** | **Percentage of Explained Variance** |
| --- | --- | --- | --- |
| **Neuroticism → Rumination → Cognitive Anxiety** | 0.41→0.58 | <0.001 | 32% |
| **Neuroticism → Evaluative Fear → Social Anxiety** | 0.37→0.62 | <0.001 | 38% |
| **Neuroticism → Self-Efficacy → Avoidance Behavior** | 0.29→-0.31 | <0.05 | 22% |
| **Total Model Explained Variance (R²)** | - | - | 72% |

Table 3 shows that neuroticism affects AELA through three paths:

Cognitive Resource Usage Path: Neuroticism enhances rumination (β = 0.41), depletes working memory resources, and leads to cognitive anxiety (β = 0.58), contributing 32% of the explained variance;

Evaluation Fear Path: Neuroticism heightens expectations of negative evaluation (β=0.37), directly increasing social anxiety (β=0.62), contributing 38% of the explained variance, making it the strongest influence path.

Avoidance Behavior Path: Neuroticism reduces self-efficacy (β=0.29), prompting students to adopt avoidance strategies (e.g., refusing to speak), which in turn further limits language practice opportunities (β=-0.31), creating a vicious cycle and contributing 22% of the explained variance.

Combining all that information, the three paths together explained 72% of the variance, indicating that neuroticism influences AELA through multidimensional mechanisms, with the evaluation fear path having the largest effect size. The above-mentioned information coincides Lian and Guo’s(2020) research in which they suggest that intervention strategies should simultaneously target cognitive regulation (e.g., reducing rumination), reshaping evaluation perspectives (e.g., reducing sensitivity to negative evaluation), and behavioral change (e.g., encouraging proactive participation in international exchanges).
